# Supplementary material for: Population coupling predicts the plasticity of stimulus responses in cortical circuits
Source: eLife journal article supplement (doi:10.7554/elife.56053), 2020-04-21
Supplement: supp [file elife-56053-supp-v1.zip]

Archive with 7 entries (7 files):
- elife_poa_e56053_Figure_3_figure_supplement_4.pdf
- elife_poa_e56053_Transparent_Reporting_File.pdf
- elife_poa_e56053_Figure_3_figure_supplement_2.pdf
- elife_poa_e56053_Figure_2_figure_supplement_1.pdf
- elife_poa_e56053_Figure_3_figure_supplement_1.pdf
- elife_poa_e56053_Figure_1_figure_supplement_1.pdf
- elife_poa_e56053_Figure_3_figure_supplement_3.pdf
