# Supplementary material for: Population coupling predicts the plasticity of stimulus responses in cortical circuits
Source: eLife journal article supplement (doi:10.7554/elife.56053), 2020-04-21

**A**

Top 75% reliable neurons

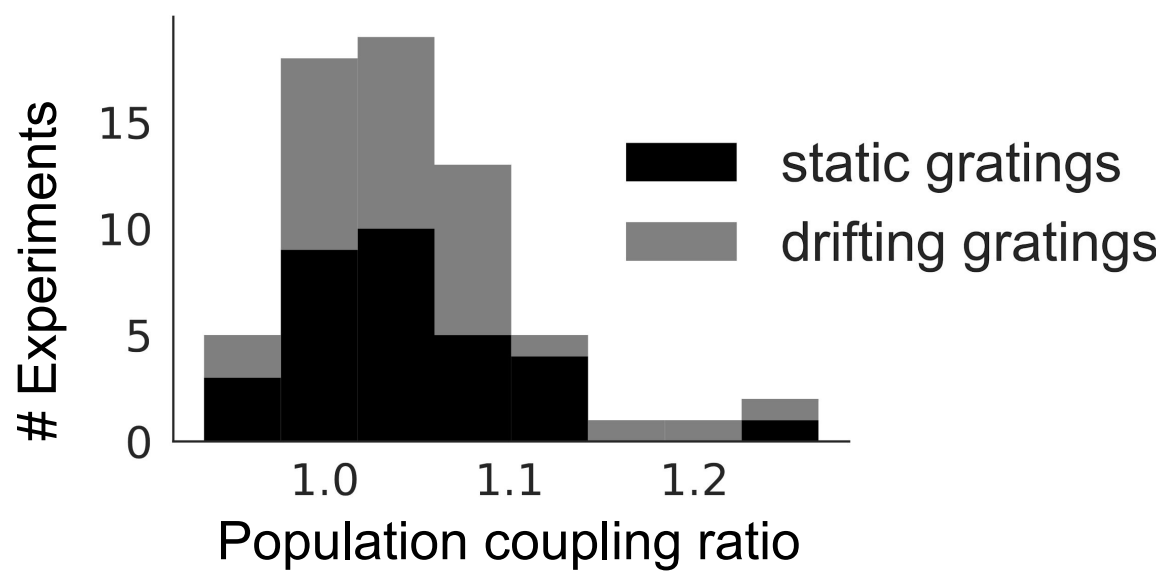**B**

All neurons

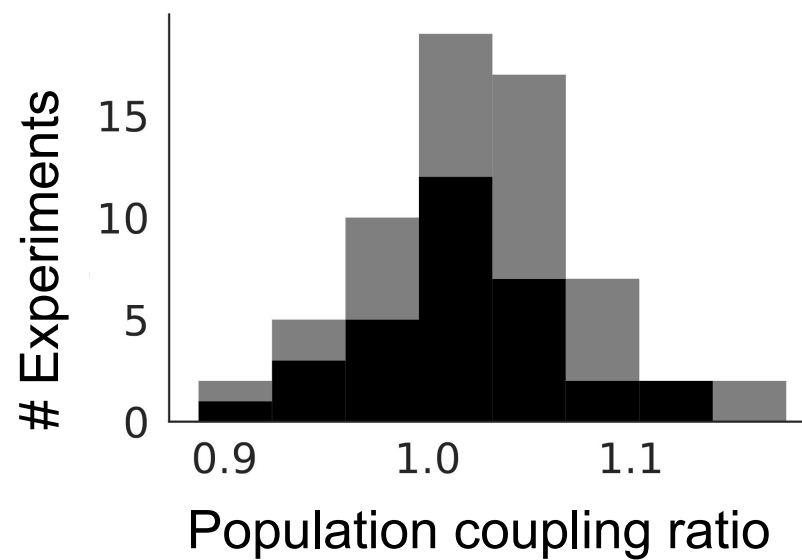**C**

Top 75% reliable neurons

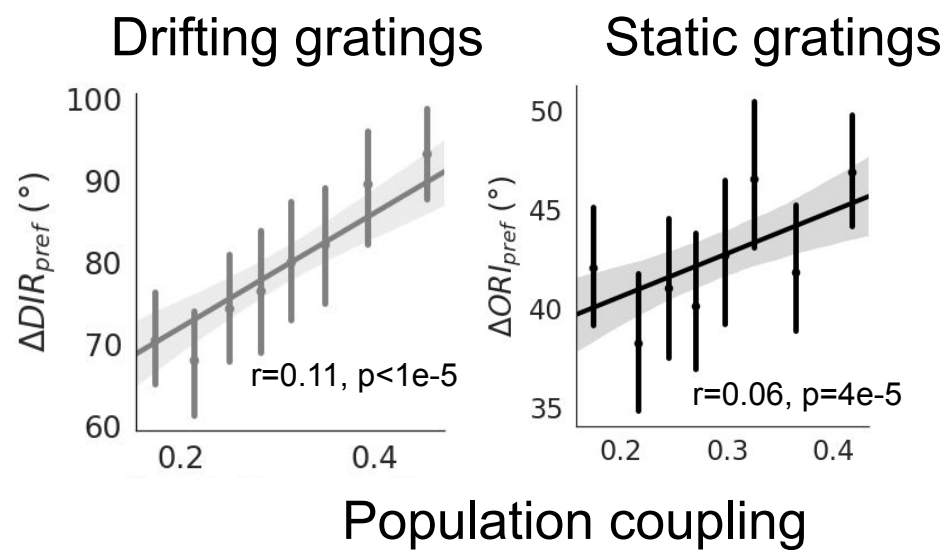**D**

All neurons

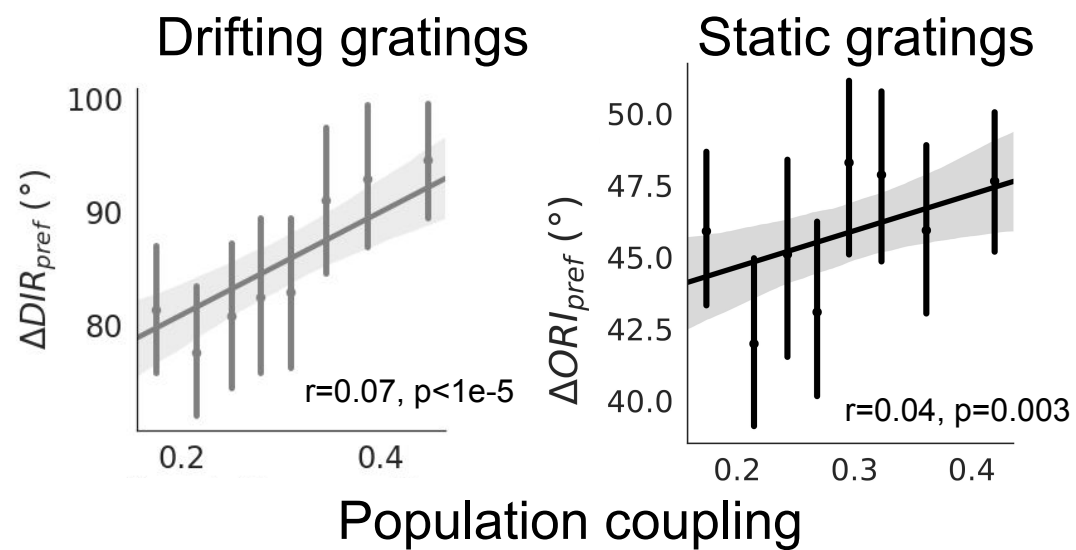**E**

Drifting gratings

Static gratings

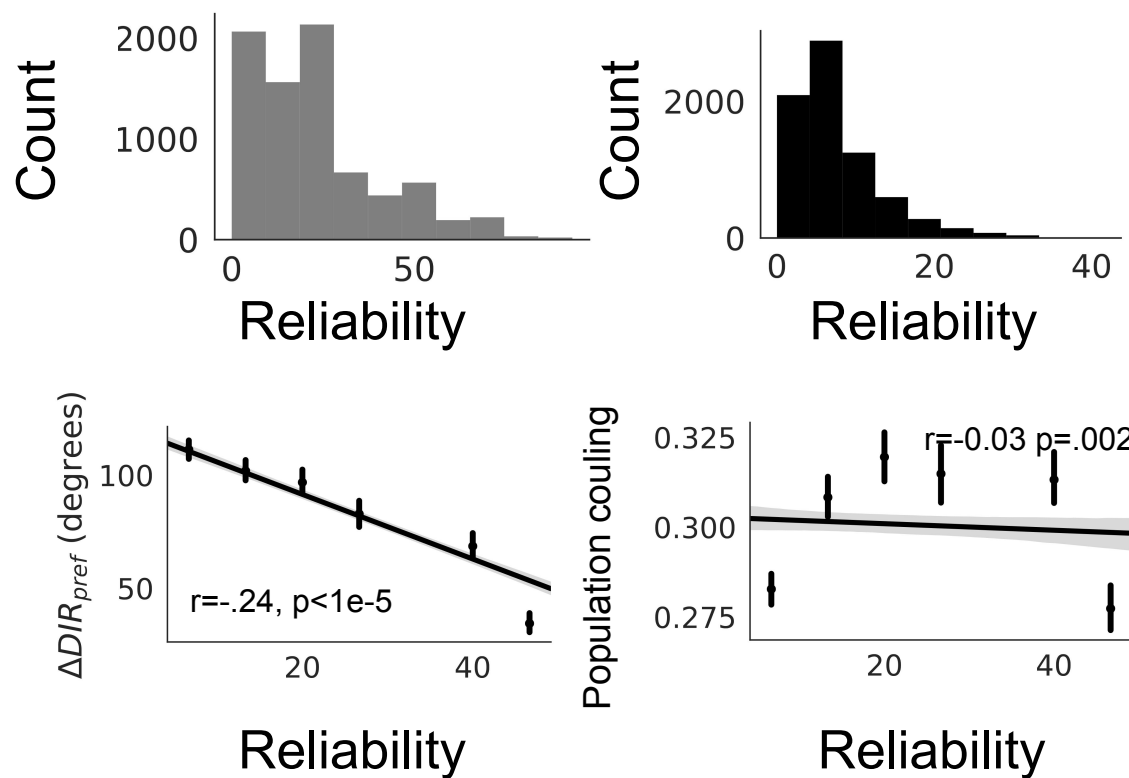**F**

■ Controlling for reliability  
 ■ Not controlling for reliability

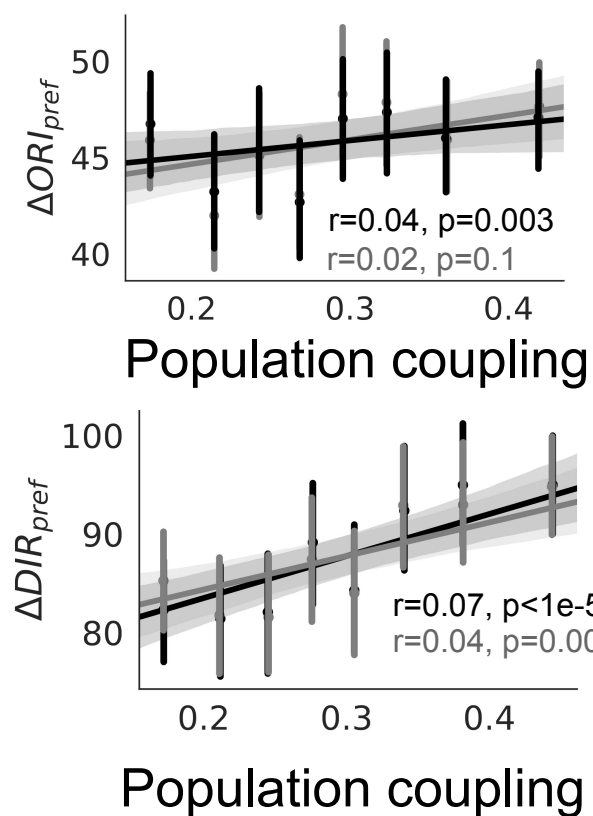

Supplement: supp [file elife-56053-supp-v1.zip › elife_poa_e56053_Figure_3_figure_supplement_2.pdf]
