# Supplementary figures and images for: Population coupling predicts the plasticity of stimulus responses in cortical circuits
Source: eLife journal article supplement (doi:10.7554/elife.56053), 2020-04-21

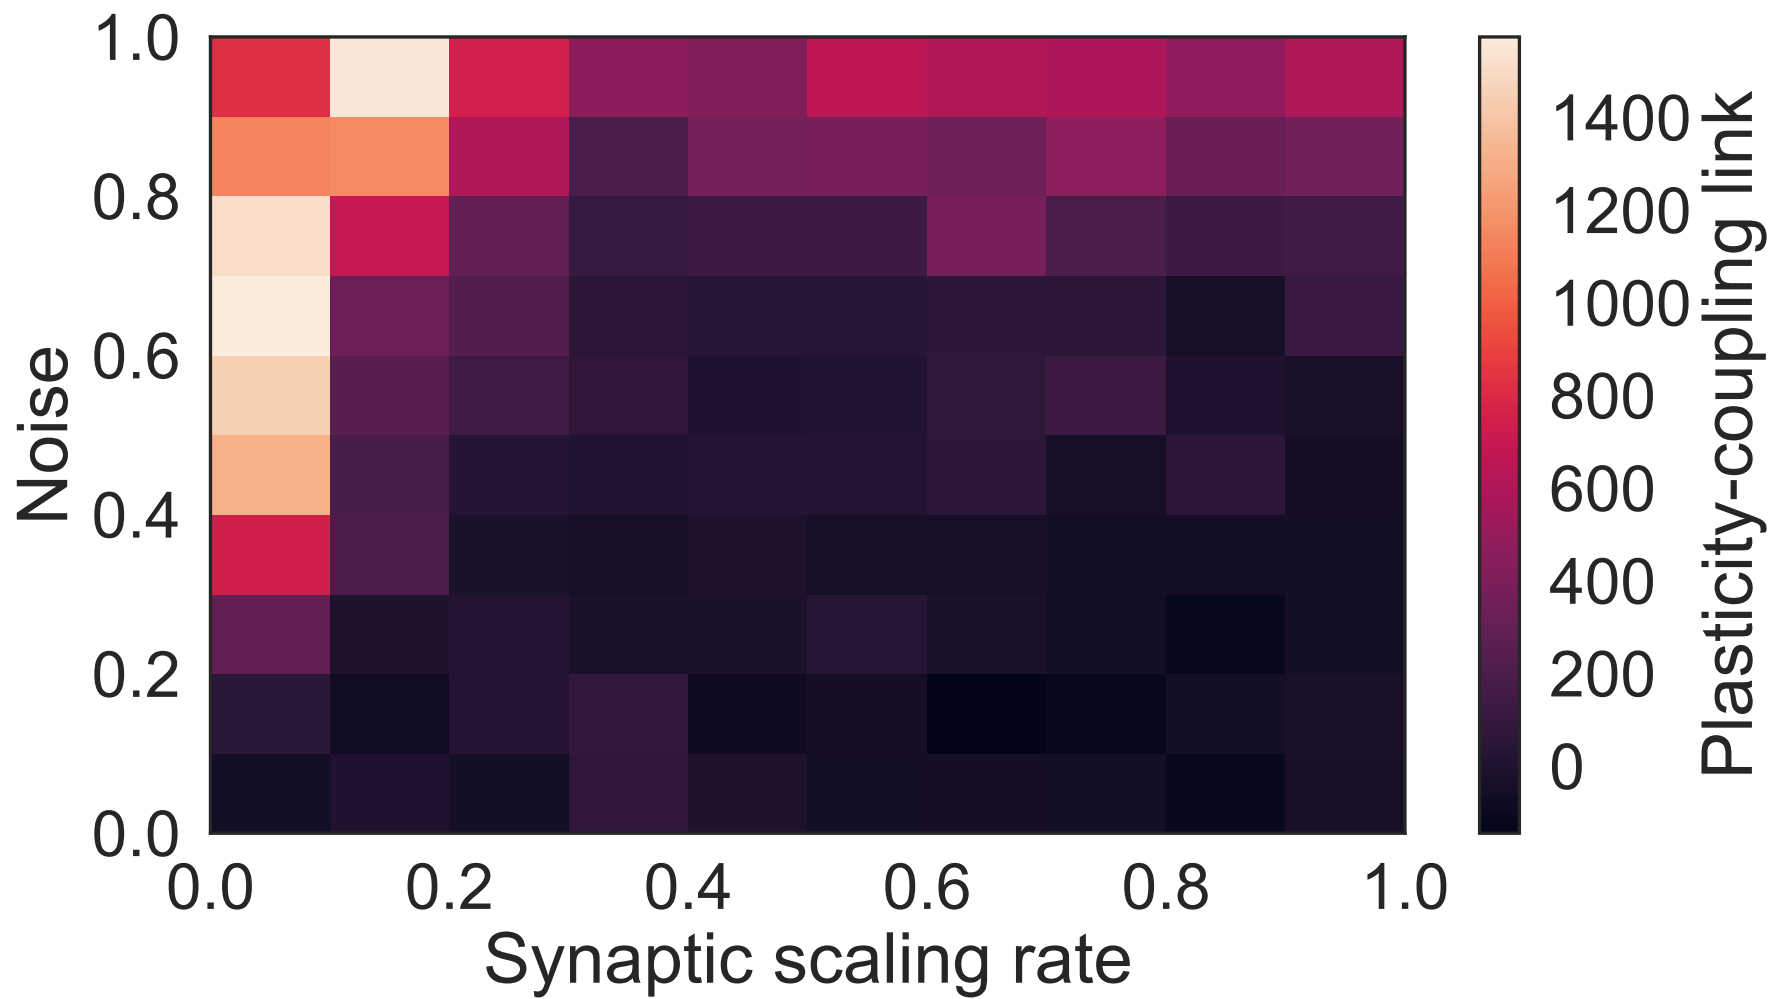

Supplement: supp [file elife-56053-supp-v1.zip]

**A**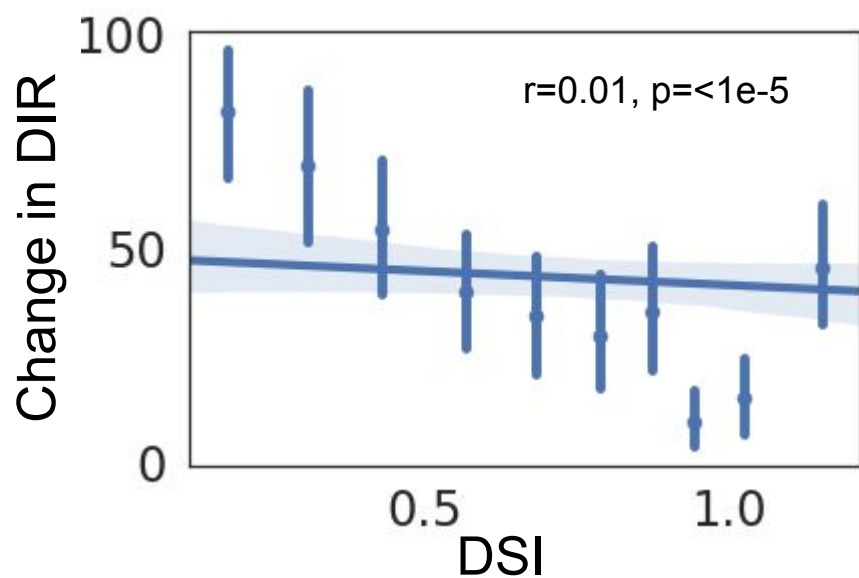**B**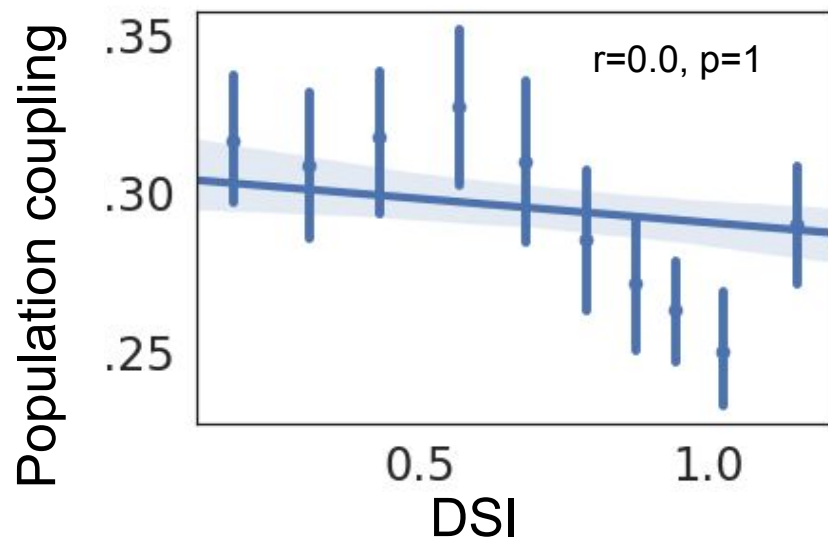**C**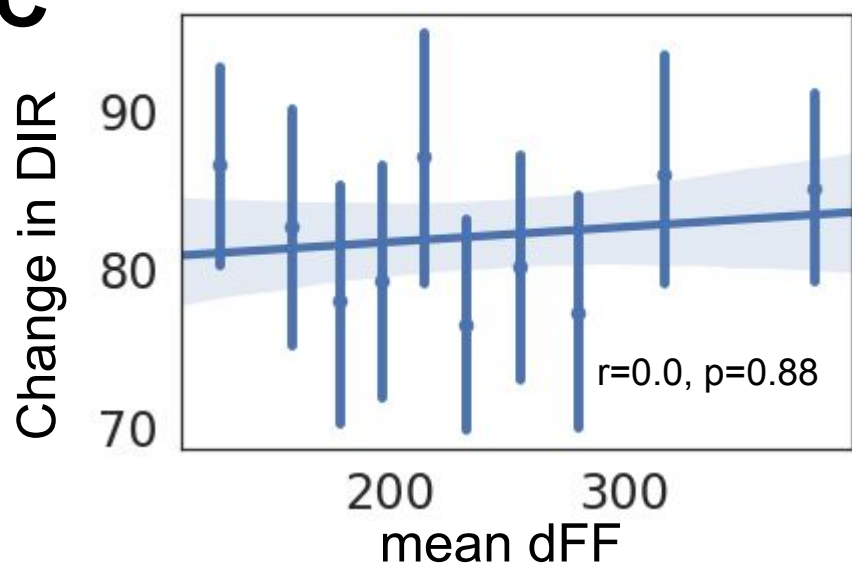**D**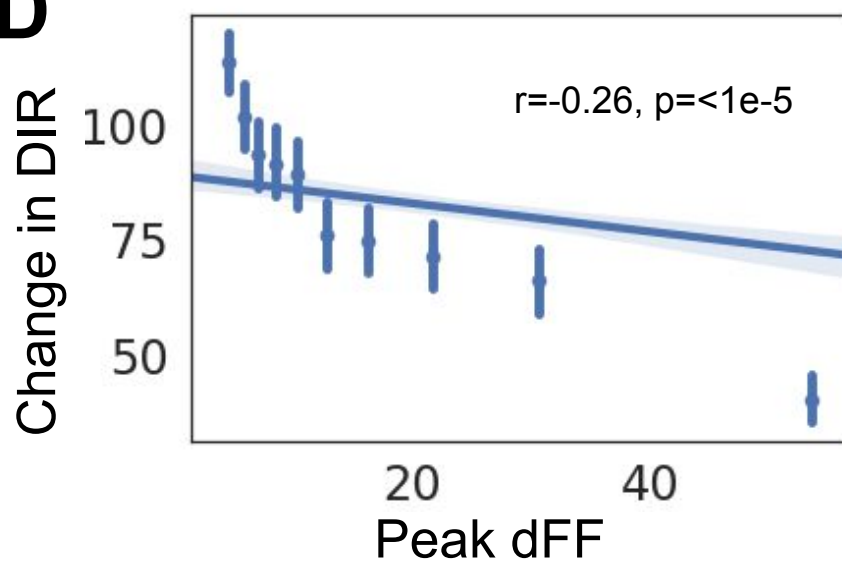**E**

Controlling for DSI

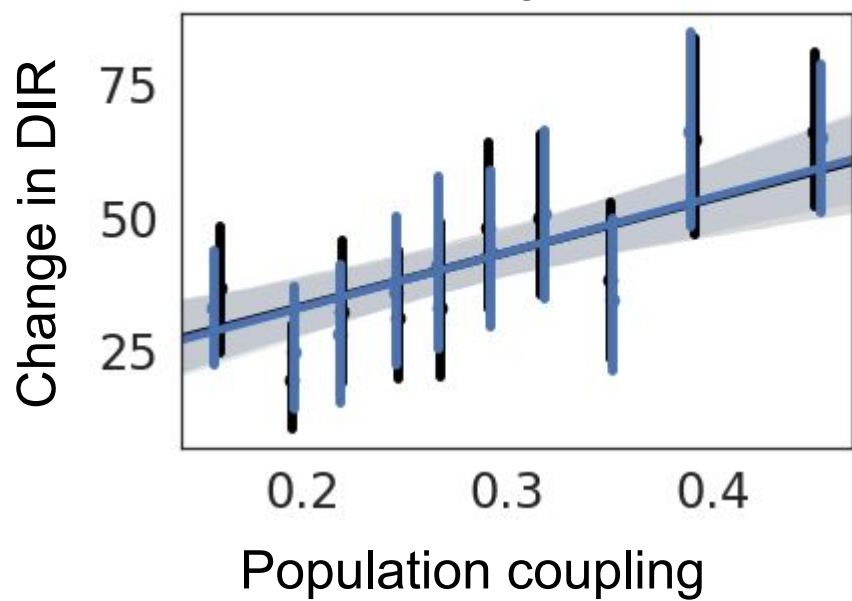**F**

Controlling for peak dFF

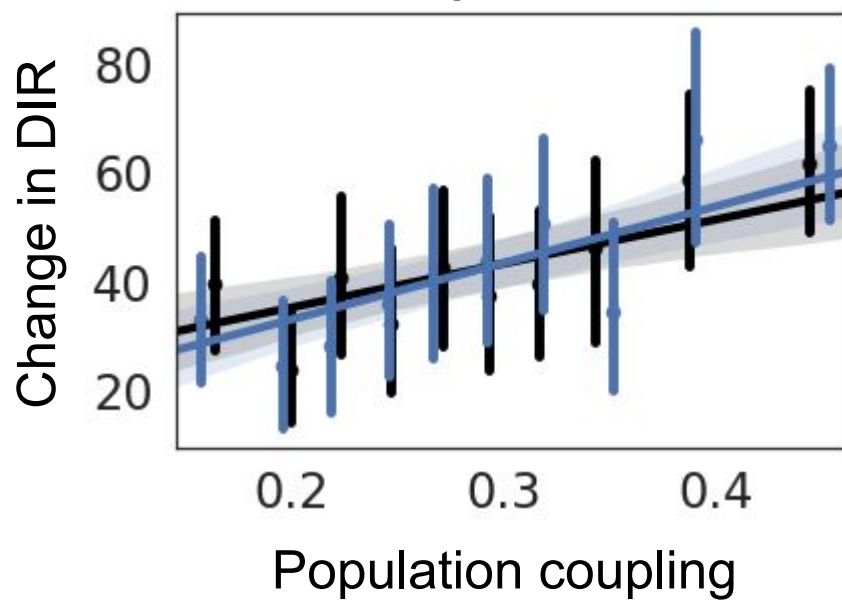

Supplement: supp [file elife-56053-supp-v1.zip]

**A** $\alpha$  range = 100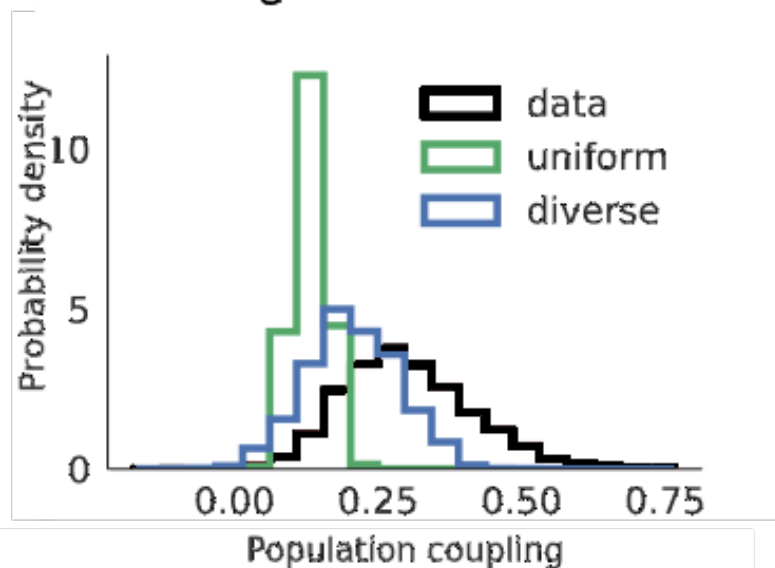**B** $\alpha$  range = 125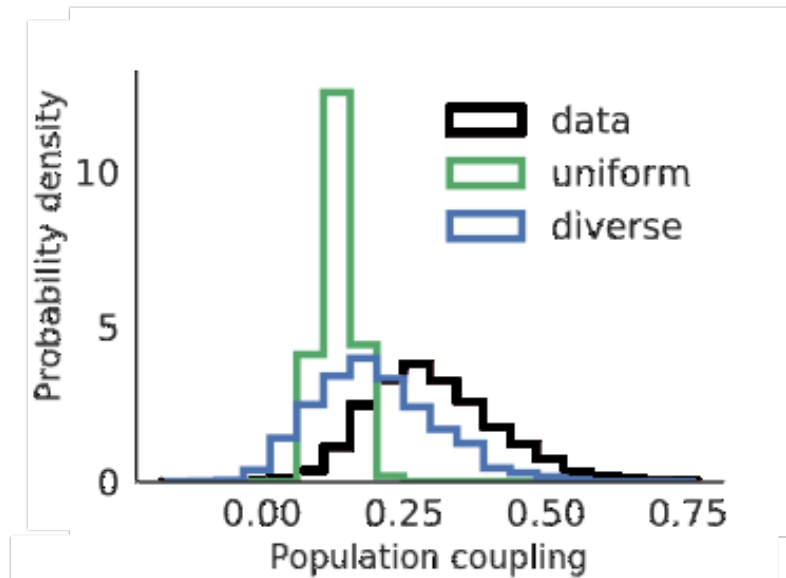**C** $\alpha$  range = 150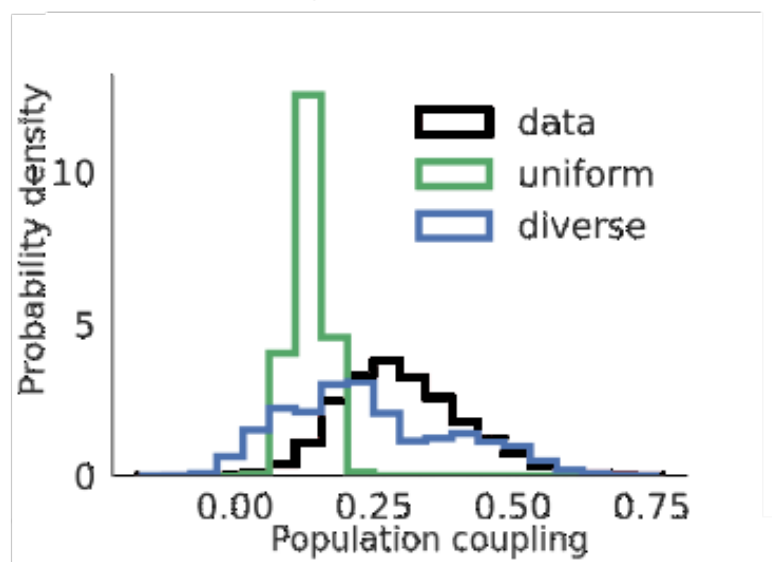**D** $\alpha$  range = 150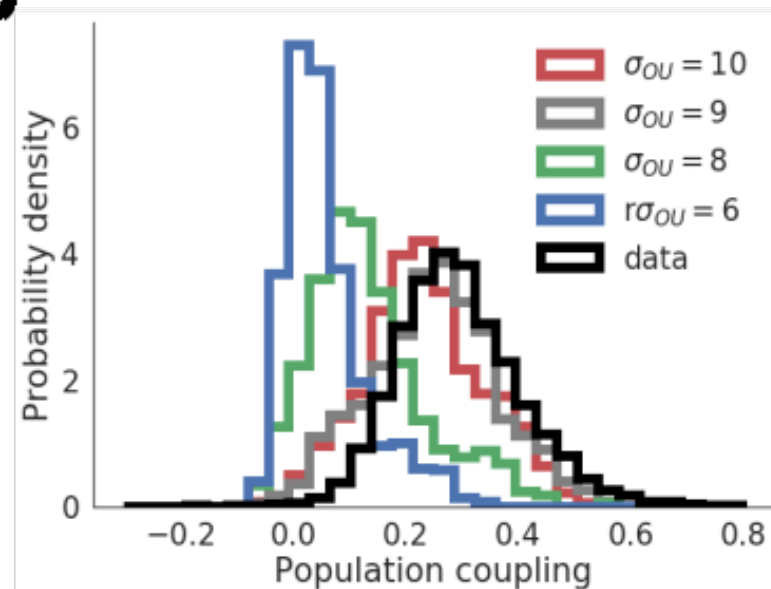

Supplement: supp [file elife-56053-supp-v1.zip › elife_poa_e56053_Figure_2_figure_supplement_1.pdf]

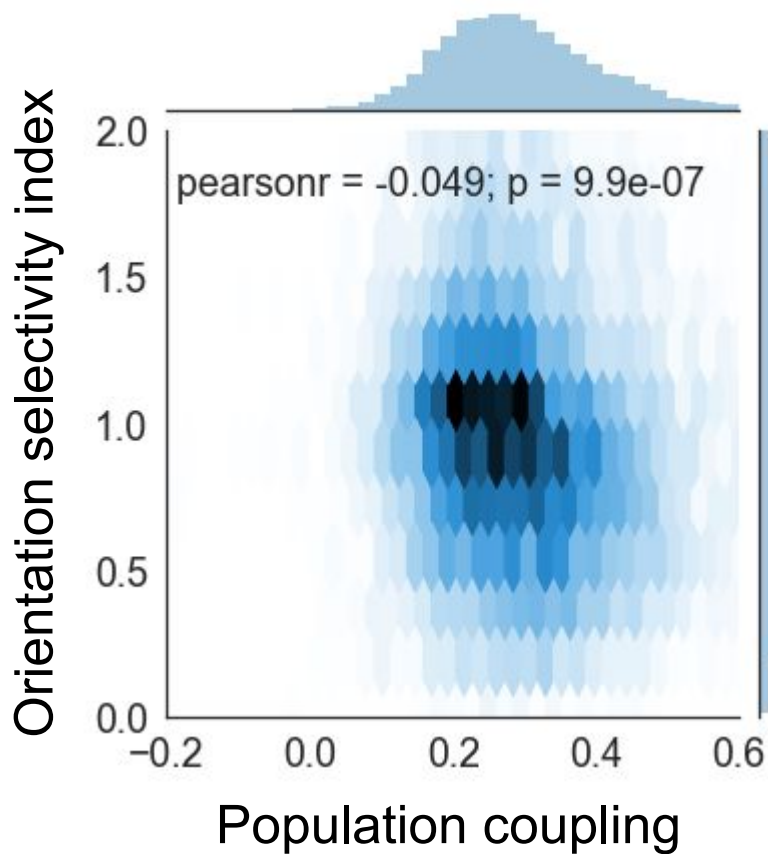

Supplement: supp [file elife-56053-supp-v1.zip › elife_poa_e56053_Figure_3_figure_supplement_1.pdf]

**A**

Static gratings, spatial frequency

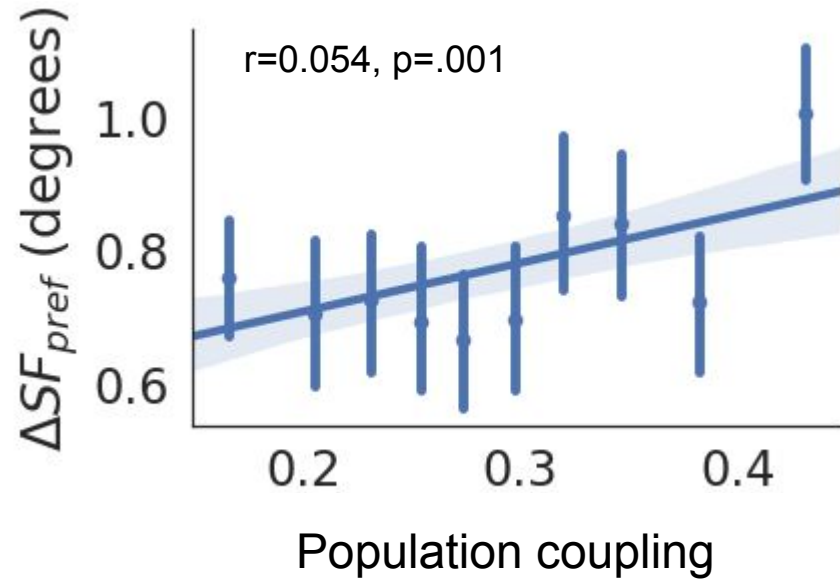**B**

Drifting gratings, temporal frequency

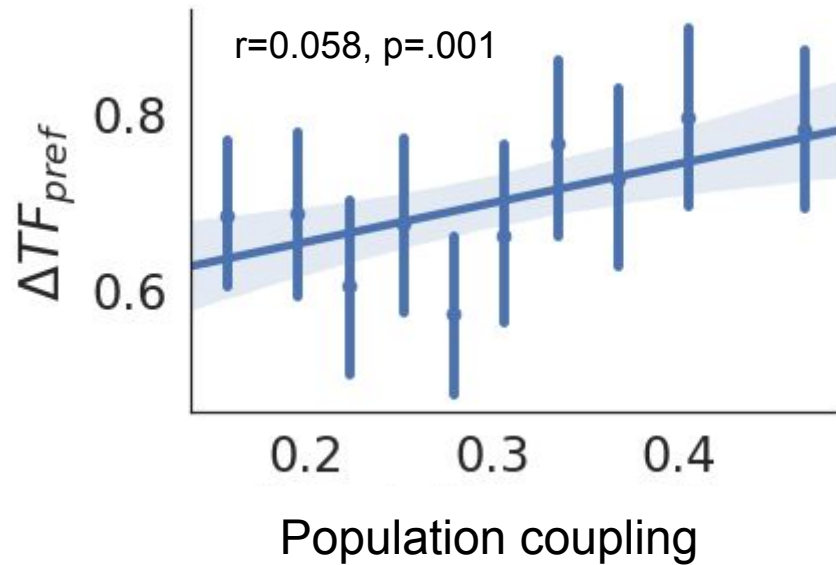

Supplement: supp [file elife-56053-supp-v1.zip › elife_poa_e56053_Figure_3_figure_supplement_3.pdf]
